# Supplementary material
Source: publisher figshare collection journal article supplement (https://acs.figshare.com/ndownloader/files/7284149)
Supplement: Supplementary file 1 [file 7284149]

 
data_rv_01 
 
_audit_creation_method            SHELXL-97 
_chemical_name_systematic 
; 
 ? 
; 
_chemical_name_common             ? 
_chemical_melting_point           ? 
_chemical_formula_moiety          'C12 H11 N3 O' 
_chemical_formula_sum 
 'C12 H11 N3 O' 
_chemical_formula_weight          213.24 
 
loop_ 
 _atom_type_symbol 
 _atom_type_description 
 _atom_type_scat_dispersion_real 
 _atom_type_scat_dispersion_imag 
 _atom_type_scat_source 
 'C'  'C'   0.0033   0.0016 
 'International Tables Vol C Tables 4.2.6.8 and 6.1.1.4' 
 'H'  'H'   0.0000   0.0000 
 'International Tables Vol C Tables 4.2.6.8 and 6.1.1.4' 
 'N'  'N'   0.0061   0.0033 
 'International Tables Vol C Tables 4.2.6.8 and 6.1.1.4' 
 'O'  'O'   0.0106   0.0060 
 'International Tables Vol C Tables 4.2.6.8 and 6.1.1.4' 
 
_symmetry_cell_setting           'Monoclinic'
_symmetry_space_group_name_H-M   'P2(1)/c  '
 
loop_ 
 _symmetry_equiv_pos_as_xyz 
 'x, y, z' 
 '-x, y+1/2, -z+1/2' 
 '-x, -y, -z' 
 'x, -y-1/2, z-1/2' 
 
_cell_length_a                    8.798(2) 
_cell_length_b                    17.333(4) 
_cell_length_c                    7.162(2) 
_cell_angle_alpha                 90.00 
_cell_angle_beta                  99.138(9) 
_cell_angle_gamma                 90.00 
_cell_volume                      1078.3(5) 
_cell_formula_units_Z             4 
_cell_measurement_temperature     150(2) 
_cell_measurement_reflns_used     2712
_cell_measurement_theta_min        2.34
_cell_measurement_theta_max       26.59
 
_exptl_crystal_description        'PLATE' 
_exptl_crystal_colour             'COLOURLESS' 
_exptl_crystal_size_max           0.41 
_exptl_crystal_size_mid           0.30 
_exptl_crystal_size_min           0.16 
_exptl_crystal_density_meas       ? 
_exptl_crystal_density_diffrn     1.313 
_exptl_crystal_density_method     'not measured' 
_exptl_crystal_F_000              448 
_exptl_absorpt_coefficient_mu     0.088 
_exptl_absorpt_correction_type    MULTI-SCAN' 
_exptl_absorpt_correction_T_min   0.9650 
_exptl_absorpt_correction_T_max   0.9861 
_exptl_absorpt_process_details    'SADABS,(BRUKER,2006)' 
 
_exptl_special_details 
; 
 ? 
; 
 
_diffrn_ambient_temperature       150(2) 
_diffrn_radiation_wavelength      0.71073 
_diffrn_radiation_type            MoK\a 
_diffrn_radiation_source          'fine-focus sealed tube' 
_diffrn_radiation_monochromator   graphite 
_diffrn_measurement_device_type   'Bruker APEX-II CCD'
_diffrn_measurement_method       '\f and \w scans'
_diffrn_detector_area_resol_mean  ? 
_diffrn_reflns_number             7736 
_diffrn_reflns_av_R_equivalents   0.0571 
_diffrn_reflns_av_sigmaI/netI     0.0548 
_diffrn_reflns_limit_h_min        -10 
_diffrn_reflns_limit_h_max        10 
_diffrn_reflns_limit_k_min        -18 
_diffrn_reflns_limit_k_max        20 
_diffrn_reflns_limit_l_min        -8 
_diffrn_reflns_limit_l_max        8 
_diffrn_reflns_theta_min          2.34 
_diffrn_reflns_theta_max          24.99 
_reflns_number_total              1912 
_reflns_number_gt                 1562 
_reflns_threshold_expression      >2sigma(I) 
 
_computing_data_collection      'Bruker APEX2'
_computing_cell_refinement      'Bruker SAINT'
_computing_data_reduction       'Bruker SAINT'  
_computing_structure_solution   'SHELXS-97 (Sheldrick, 2008)'
_computing_structure_refinement 'SHELXL-97 (Sheldrick, 2008)'
_computing_molecular_graphics   'Bruker SHELXTL'
_computing_publication_material 'Bruker SHELXTL'
 
_refine_special_details 
; 
 Refinement of F^2^ against ALL reflections.  The weighted R-factor wR and 
 goodness of fit S are based on F^2^, conventional R-factors R are based 
 on F, with F set to zero for negative F^2^. The threshold expression of 
 F^2^ > 2sigma(F^2^) is used only for calculating R-factors(gt) etc. and is 
 not relevant to the choice of reflections for refinement.  R-factors based 
 on F^2^ are statistically about twice as large as those based on F, and R- 
 factors based on ALL data will be even larger. 
; 
 
_refine_ls_structure_factor_coef  Fsqd  
_refine_ls_matrix_type            full 
_refine_ls_weighting_scheme       calc  
_refine_ls_weighting_details 
 'calc w=1/[\s^2^(Fo^2^)+(0.0396P)^2^+5.4840P] where P=(Fo^2^+2Fc^2^)/3' 
_atom_sites_solution_primary      direct 
_atom_sites_solution_secondary    difmap 
_atom_sites_solution_hydrogens    geom 
_refine_ls_hydrogen_treatment     CONSTR 
_refine_ls_extinction_method      none 
_refine_ls_extinction_coef        ? 
_refine_ls_number_reflns          1912 
_refine_ls_number_parameters      146 
_refine_ls_number_restraints      0 
_refine_ls_R_factor_all           0.1197 
_refine_ls_R_factor_gt            0.1026 
_refine_ls_wR_factor_ref          0.2232 
_refine_ls_wR_factor_gt           0.2150 
_refine_ls_goodness_of_fit_ref    1.129 
_refine_ls_restrained_S_all       1.129 
_refine_ls_shift/su_max           0.001 
_refine_ls_shift/su_mean          0.000 
 
loop_ 
 _atom_site_label 
 _atom_site_type_symbol 
 _atom_site_fract_x 
 _atom_site_fract_y 
 _atom_site_fract_z 
 _atom_site_U_iso_or_equiv 
 _atom_site_adp_type 
 _atom_site_occupancy 
 _atom_site_symmetry_multiplicity 
 _atom_site_calc_flag 
 _atom_site_refinement_flags 
 _atom_site_disorder_assembly 
 _atom_site_disorder_group 
O1 O -0.0085(4) -0.18146(19) 0.3031(6) 0.0342(9) Uani 1 1 d . . . 
N1 N 0.4307(5) 0.2903(2) 0.3543(6) 0.0292(10) Uani 1 1 d . . . 
N2 N 0.1145(4) 0.0654(2) 0.2261(5) 0.0226(9) Uani 1 1 d . . . 
N3 N 0.1797(4) -0.0042(2) 0.2615(5) 0.0225(9) Uani 1 1 d . . . 
C1 C 0.3649(5) 0.2360(3) 0.3733(7) 0.0236(11) Uani 1 1 d . . . 
C2 C 0.2777(6) 0.1649(3) 0.3955(7) 0.0268(11) Uani 1 1 d . . . 
H2A H 0.1943 0.1761 0.4695 0.032 Uiso 1 1 calc R . . 
H2B H 0.3469 0.1260 0.4657 0.032 Uiso 1 1 calc R . . 
C3 C 0.2088(6) 0.1327(3) 0.2034(7) 0.0278(12) Uani 1 1 d . . . 
H3A H 0.1450 0.1727 0.1299 0.033 Uiso 1 1 calc R . . 
H3B H 0.2924 0.1181 0.1327 0.033 Uiso 1 1 calc R . . 
C4 C -0.0434(5) 0.0629(3) 0.2135(6) 0.0198(10) Uani 1 1 d . . . 
C5 C -0.1529(6) 0.1215(3) 0.1814(7) 0.0292(12) Uani 1 1 d . . . 
H5 H -0.1248 0.1737 0.1657 0.035 Uiso 1 1 calc R . . 
C6 C -0.3044(6) 0.0993(3) 0.1738(8) 0.0344(13) Uani 1 1 d . . . 
H6 H -0.3829 0.1373 0.1527 0.041 Uiso 1 1 calc R . . 
C7 C -0.3455(6) 0.0218(3) 0.1964(7) 0.0297(12) Uani 1 1 d . . . 
H7 H -0.4513 0.0090 0.1894 0.036 Uiso 1 1 calc R . . 
C8 C -0.2378(5) -0.0357(3) 0.2282(6) 0.0202(10) Uani 1 1 d . . . 
H8 H -0.2673 -0.0879 0.2424 0.024 Uiso 1 1 calc R . . 
C9 C -0.0808(5) -0.0149(2) 0.2394(6) 0.0181(10) Uani 1 1 d . . . 
C10 C 0.0646(5) -0.0532(3) 0.2695(6) 0.0175(10) Uani 1 1 d . . . 
C11 C 0.0968(5) -0.1359(3) 0.3022(7) 0.0232(11) Uani 1 1 d . . . 
C12 C 0.2610(6) -0.1609(3) 0.3347(8) 0.0348(13) Uani 1 1 d . . . 
H12A H 0.2719 -0.2075 0.4133 0.052 Uiso 1 1 calc R . . 
H12B H 0.3252 -0.1197 0.3993 0.052 Uiso 1 1 calc R . . 
H12C H 0.2938 -0.1720 0.2130 0.052 Uiso 1 1 calc R . . 
 
loop_ 
 _atom_site_aniso_label 
 _atom_site_aniso_U_11 
 _atom_site_aniso_U_22 
 _atom_site_aniso_U_33 
 _atom_site_aniso_U_23 
 _atom_site_aniso_U_13 
 _atom_site_aniso_U_12 
O1 0.034(2) 0.0177(18) 0.053(2) 0.0003(16) 0.0114(18) -0.0037(16) 
N1 0.025(2) 0.027(2) 0.036(3) -0.0023(19) 0.0048(18) -0.0033(19) 
N2 0.029(2) 0.019(2) 0.019(2) 0.0000(16) 0.0016(16) -0.0068(17) 
N3 0.026(2) 0.021(2) 0.021(2) -0.0031(17) 0.0036(16) -0.0035(17) 
C1 0.023(2) 0.027(3) 0.021(2) -0.006(2) 0.0041(19) -0.003(2) 
C2 0.036(3) 0.025(3) 0.019(2) -0.003(2) 0.005(2) -0.007(2) 
C3 0.038(3) 0.026(3) 0.019(3) 0.000(2) 0.006(2) -0.006(2) 
C4 0.028(3) 0.015(2) 0.017(2) 0.0010(18) 0.0030(19) -0.0037(19) 
C5 0.037(3) 0.021(3) 0.028(3) 0.000(2) 0.000(2) 0.005(2) 
C6 0.032(3) 0.032(3) 0.036(3) 0.004(2) -0.005(2) 0.012(2) 
C7 0.024(3) 0.039(3) 0.026(3) 0.002(2) 0.005(2) 0.003(2) 
C8 0.024(2) 0.024(3) 0.012(2) -0.0048(19) 0.0020(18) -0.002(2) 
C9 0.027(2) 0.017(2) 0.010(2) -0.0017(17) 0.0029(18) -0.0026(19) 
C10 0.022(2) 0.020(2) 0.012(2) -0.0011(18) 0.0051(17) -0.0009(19) 
C11 0.027(3) 0.021(3) 0.023(3) 0.001(2) 0.008(2) -0.001(2) 
C12 0.033(3) 0.030(3) 0.043(3) 0.007(2) 0.008(2) 0.006(2) 
 
_geom_special_details 
; 
 All esds (except the esd in the dihedral angle between two l.s. planes) 
 are estimated using the full covariance matrix.  The cell esds are taken 
 into account individually in the estimation of esds in distances, angles 
 and torsion angles; correlations between esds in cell parameters are only 
 used when they are defined by crystal symmetry.  An approximate (isotropic) 
 treatment of cell esds is used for estimating esds involving l.s. planes. 
; 
 
loop_ 
 _geom_bond_atom_site_label_1 
 _geom_bond_atom_site_label_2 
 _geom_bond_distance 
 _geom_bond_site_symmetry_2 
 _geom_bond_publ_flag 
O1 C11 1.218(6) . ? 
N1 C1 1.125(6) . ? 
N2 N3 1.342(5) . ? 
N2 C4 1.379(6) . ? 
N2 C3 1.456(6) . ? 
N3 C10 1.329(6) . ? 
C1 C2 1.474(7) . ? 
C2 C3 1.518(7) . ? 
C2 H2A 0.9900 . ? 
C2 H2B 0.9900 . ? 
C3 H3A 0.9900 . ? 
C3 H3B 0.9900 . ? 
C4 C5 1.393(7) . ? 
C4 C9 1.407(6) . ? 
C5 C6 1.380(7) . ? 
C5 H5 0.9500 . ? 
C6 C7 1.407(8) . ? 
C6 H6 0.9500 . ? 
C7 C8 1.370(7) . ? 
C7 H7 0.9500 . ? 
C8 C9 1.417(6) . ? 
C8 H8 0.9500 . ? 
C9 C10 1.427(6) . ? 
C10 C11 1.472(6) . ? 
C11 C12 1.490(7) . ? 
C12 H12A 0.9800 . ? 
C12 H12B 0.9800 . ? 
C12 H12C 0.9800 . ? 
 
loop_ 
 _geom_angle_atom_site_label_1 
 _geom_angle_atom_site_label_2 
 _geom_angle_atom_site_label_3 
 _geom_angle 
 _geom_angle_site_symmetry_1 
 _geom_angle_site_symmetry_3 
 _geom_angle_publ_flag 
N3 N2 C4 112.3(4) . . ? 
N3 N2 C3 120.5(4) . . ? 
C4 N2 C3 127.2(4) . . ? 
C10 N3 N2 106.1(4) . . ? 
N1 C1 C2 179.2(5) . . ? 
C1 C2 C3 110.4(4) . . ? 
C1 C2 H2A 109.6 . . ? 
C3 C2 H2A 109.6 . . ? 
C1 C2 H2B 109.6 . . ? 
C3 C2 H2B 109.6 . . ? 
H2A C2 H2B 108.1 . . ? 
N2 C3 C2 110.2(4) . . ? 
N2 C3 H3A 109.6 . . ? 
C2 C3 H3A 109.6 . . ? 
N2 C3 H3B 109.6 . . ? 
C2 C3 H3B 109.6 . . ? 
H3A C3 H3B 108.1 . . ? 
N2 C4 C5 130.6(4) . . ? 
N2 C4 C9 106.0(4) . . ? 
C5 C4 C9 123.4(4) . . ? 
C6 C5 C4 116.2(5) . . ? 
C6 C5 H5 121.9 . . ? 
C4 C5 H5 121.9 . . ? 
C5 C6 C7 121.7(5) . . ? 
C5 C6 H6 119.1 . . ? 
C7 C6 H6 119.1 . . ? 
C8 C7 C6 122.0(5) . . ? 
C8 C7 H7 119.0 . . ? 
C6 C7 H7 119.0 . . ? 
C7 C8 C9 117.8(4) . . ? 
C7 C8 H8 121.1 . . ? 
C9 C8 H8 121.1 . . ? 
C4 C9 C8 118.9(4) . . ? 
C4 C9 C10 104.1(4) . . ? 
C8 C9 C10 137.1(4) . . ? 
N3 C10 C9 111.5(4) . . ? 
N3 C10 C11 120.0(4) . . ? 
C9 C10 C11 128.5(4) . . ? 
O1 C11 C10 120.3(4) . . ? 
O1 C11 C12 122.0(4) . . ? 
C10 C11 C12 117.7(4) . . ? 
C11 C12 H12A 109.5 . . ? 
C11 C12 H12B 109.5 . . ? 
H12A C12 H12B 109.5 . . ? 
C11 C12 H12C 109.5 . . ? 
H12A C12 H12C 109.5 . . ? 
H12B C12 H12C 109.5 . . ? 
 
loop_ 
 _geom_torsion_atom_site_label_1 
 _geom_torsion_atom_site_label_2 
 _geom_torsion_atom_site_label_3 
 _geom_torsion_atom_site_label_4 
 _geom_torsion 
 _geom_torsion_site_symmetry_1 
 _geom_torsion_site_symmetry_2 
 _geom_torsion_site_symmetry_3 
 _geom_torsion_site_symmetry_4 
 _geom_torsion_publ_flag 
C4 N2 N3 C10 0.9(5) . . . . ? 
C3 N2 N3 C10 -178.4(4) . . . . ? 
N1 C1 C2 C3 17(39) . . . . ? 
N3 N2 C3 C2 -82.0(5) . . . . ? 
C4 N2 C3 C2 98.9(5) . . . . ? 
C1 C2 C3 N2 -176.3(4) . . . . ? 
N3 N2 C4 C5 179.1(5) . . . . ? 
C3 N2 C4 C5 -1.7(8) . . . . ? 
N3 N2 C4 C9 -1.2(5) . . . . ? 
C3 N2 C4 C9 178.1(4) . . . . ? 
N2 C4 C5 C6 179.0(5) . . . . ? 
C9 C4 C5 C6 -0.7(7) . . . . ? 
C4 C5 C6 C7 -0.2(8) . . . . ? 
C5 C6 C7 C8 0.4(8) . . . . ? 
C6 C7 C8 C9 0.5(7) . . . . ? 
N2 C4 C9 C8 -178.2(4) . . . . ? 
C5 C4 C9 C8 1.6(7) . . . . ? 
N2 C4 C9 C10 0.9(5) . . . . ? 
C5 C4 C9 C10 -179.3(4) . . . . ? 
C7 C8 C9 C4 -1.4(6) . . . . ? 
C7 C8 C9 C10 179.9(5) . . . . ? 
N2 N3 C10 C9 -0.3(5) . . . . ? 
N2 N3 C10 C11 178.6(4) . . . . ? 
C4 C9 C10 N3 -0.4(5) . . . . ? 
C8 C9 C10 N3 178.4(5) . . . . ? 
C4 C9 C10 C11 -179.1(4) . . . . ? 
C8 C9 C10 C11 -0.2(8) . . . . ? 
N3 C10 C11 O1 -177.4(4) . . . . ? 
C9 C10 C11 O1 1.2(7) . . . . ? 
N3 C10 C11 C12 2.9(6) . . . . ? 
C9 C10 C11 C12 -178.5(4) . . . . ? 
 
_diffrn_measured_fraction_theta_max    0.998 
_diffrn_reflns_theta_full              24.99 
_diffrn_measured_fraction_theta_full   0.998 
_refine_diff_density_max    0.460 
_refine_diff_density_min   -0.326 
_refine_diff_density_rms    0.086 
